# Supplementary material for: The impact of in vitro cell culture duration on the maturation of human cardiomyocytes derived from induced pluripotent stem cells of myogenic origin
Source: PubMed Central journal article supplement — Cell Transplant. 2018 Jun 27;27(7):1047–67. doi: 10.1177/0963689718779346 (PMC6158549; doi:10.1177/0963689718779346), 2018-06-27
Supplement: Supplementary_table.pdf [file Supplementary_table.pdf]

## Supplementary Tables

Supplementary Table 1. Antibodies used for immunostaining of marker proteins.

| Antibody                       | Vendor                          | Detection                                  | Concentration  |
|--------------------------------|---------------------------------|--------------------------------------------|----------------|
| OCT4                           | Abcam                           |                                            | 1:200          |
| SOX2                           |                                 |                                            | 1:250          |
| c-MYC                          | Cambridge                       | Nuclear pluripotency markers               | 1:100          |
| KLF-4                          | (UK)                            |                                            | 1:50           |
| NANOG                          |                                 |                                            | 1:25           |
| SSEA-4                         | Abcam                           |                                            | 1:100          |
| <b>(przyżyciowe)</b><br>SSEA-4 | Cambridge                       | Surface pluripotency markers               | 1:200          |
| TRA 1-60                       | (UK)                            |                                            | 1:100          |
| TRA 1-81                       |                                 |                                            | 1:100          |
| desmin                         |                                 | Myoblast indicator                         | 1:200          |
| AFP                            | Abcam                           | Endodermal lineage marker                  | 1:500          |
| SMA                            | Cambridge                       | Mesodermal lineage marker                  | 1:100          |
| TUJ1                           | (UK)                            | Ectodermal lineage marker                  | 1:500          |
| NKX2-5                         |                                 | Cardiac progenitor marker                  | 1:250          |
| TNNT2                          | Abcam                           |                                            | 1:200          |
| CNX43                          | Cambridge                       | Mature cardiomyocyte markers               | 1:200          |
| $\alpha$ -MHC                  | (UK)                            |                                            | 1:200          |
| $\alpha$ -aktylina             | Sigma-Aldrich<br>St. Louis, USA |                                            | 1:500          |
| Alexa Fluor 488                |                                 |                                            | 1:500          |
| Alexa Fluor 594                |                                 |                                            | 1:500          |
| IgG-FITC                       | Abcam                           | Fluorochrome conjugated secondary antibody | 1:1000         |
| TexasRed<br>(SAR+TR)           | Cambridge<br>(UK)               |                                            | 1:1000         |
| Anti-Histon3methylK3           |                                 |                                            | Nuclear marker |

Abbreviations: **OCT4** octamer-binding transcription factor 4; **SOX2** sex determining region Y - box 2; **c-MYC** cellular c-Myc oncogene product; **Klf4** Kruppel-like factor 4; **NANOG** Nanog homeobox; **SSEA4** stage-specific embryonic antigen-4; **TRA 1-60 / 81** tissue rejection antigen1-60/1-81; **AFP**  $\alpha$ -fetoprotein; **SMA** smooth muscle actin; **TUJ-1** neuron-specific class III beta-tubulin; **NKX2-5** NK2 homeobox 5; **TNNT2** cardiac troponin T; **CX43** connexin-43;  **$\alpha$ -MHC** myosin heavy chain  $\alpha$ ; **IgG – FITC** anti-human IgG fluorescein isothiocyanate conjugated secondary antibody; **SAR+TR** secondary antibody red Texas Red conjugated.

Supplementary Table 2. Primer sequences for PCR and qRT-PCR.

| Gene                                      | Primer  | Primer sequence (5'→3')  | Product length |
|-------------------------------------------|---------|--------------------------|----------------|
| <b>ACTB</b>                               | Forward | CTTCCTGGGCATGGAGTCC      | 192 bp         |
|                                           | Reverse | ATCTTGATCTTCATTGTGCTG    |                |
| <b>GAPDH</b>                              | Forward | GCTCTCTGCTCCTCCTGTTC     | 112 bp         |
|                                           | Reverse | ACCAAATCCGTTGACTCCGA     |                |
| <b>OCT4</b>                               | Forward | CTCACCCCTGGGGGTTCTATT    | 203 bp         |
|                                           | Reverse | CTGGTTCGCTTTTCTCTTTTCG   |                |
| <b>SOX2</b>                               | Forward | TGGGTTCCGGTGGTCAAGTC     | 233 bp         |
|                                           | Reverse | CATGTGTGAGAGGGGCAGTG     |                |
| <b>NANOG</b>                              | Forward | TGGTGTGACGCAGAAGGC       | 233 bp         |
|                                           | Reverse | CACTGGCAGGAGAATTTGGC     |                |
| <b>cMYC</b>                               | Forward | GGTCTTCCCCTACCCTCTCA     | 296 bp         |
|                                           | Reverse | AGCCTGCCTCTTTTCCACA      |                |
| <b>MyoD</b>                               | Forward | AGCACTACAGCGGCGGACT      | 242 bp         |
|                                           | Reverse | GCGACTCAGAAGGCACGTC      |                |
| <b>Brachyury</b>                          | Forward | GCCGACTATATGCTGCTCAT     | 215 bp         |
|                                           | Reverse | TCGTCCAGTAGGTTGTTGGT     |                |
| <b>NKX2-5</b>                             | Forward | AGAGCCGAAAAGAAAGCCTGAA   | 246 bp         |
|                                           | Reverse | CCGCACAGTAATGGTAAGGGA    |                |
| <b>TNNT2</b>                              | Forward | AGAGCGGAAAAGTGGGAAGA     | 235 bp         |
|                                           | Reverse | CTGGTTATCGTTGATCCTGT     |                |
| <b>MYH6<br/>(<math>\alpha</math>-MHC)</b> | Forward | CAACGCACAAAGTGAGGATG     | 151 bp         |
|                                           | Reverse | CCTACGCAACTGCCGATACT     |                |
| <b>MYH7<br/>(<math>\beta</math>-MHC)</b>  | Forward | GGCAAGACAGTGACCGTGAAG    | 134 bp         |
|                                           | Reverse | CGTAGCGATCCTTGAGGTTGTA   |                |
| <b>CX43</b>                               | Forward | AGAGGAAGAAGAAGCAAGGTTGCC | 182 bp         |
|                                           | Reverse | AGGCCACCTCAAAGATAGACT    |                |
| <b>TNNI 3</b>                             | Forward | TGTGGACAAGGTGGATGAAG     | 142 bp         |
|                                           | Reverse | AGGCCACCTCAAAGATAGACT    |                |
| <b>TNNI 1</b>                             | Forward | TCCGTGGGAAGTTCAAGCG      | 238 bp         |
|                                           | Reverse | GACTTGGCGGCATCAAACATC    |                |
| <b>KCNJ2</b>                              | Forward | TTGTCAAGAGCCAAGACACA     | 171 bp         |
|                                           | Reverse | AGCAACACACATCTGGGAAT     |                |
| <b>SERCA2A</b>                            | Forward | TGGGTGTATGGCAGGAAAGAA    | 222 bp         |
|                                           | Reverse | ACTGGTCAACTCTTAGTGTGGTA  |                |

Abbreviations: *CX43*—connexin 43; *GAPDH*— glycerinaldehyde 3-phosphate dehydrogenase; *OCT4* – octamer-binding transcription factor 4; *SOX2* – SRY (sex determining region Y)-box 2; *MyoD* – myogenin differentiation 1; *NKX2-5* – NK2 homeobox 5; *TNNT2* – cardiac troponin T; *TNNI* – troponin I; *MYH6* ( $\alpha$ -MHC) –  $\alpha$  myosin heavy chain, *MYH7* ( $\beta$ -MHC) –  $\beta$  myosin heavy chain, *KCNJ2* – potassium voltage-gated channel subfamily J member 2; *SERCA 2A* – sarcoplasmic/endoplasmic reticulum calcium ATPase; *ACTB*—beta actin.

Supplementary Table 3. qRT-PCR reaction conditions

|                                                           | <b>qRT-PCR<br/>reaction</b> | <b>PCR<br/>reaction</b> |
|-----------------------------------------------------------|-----------------------------|-------------------------|
| <b>Pre-denaturation</b>                                   | 95°C, 1 min                 | 95°C, 5 min             |
| <b>Denaturation</b>                                       | 95°C, 20 sec                | 95°C, 45 sec            |
| <b>Primer annealing</b>                                   | 60°C, 20 sec                | 60°C, 45 sec            |
| <b>Elongation</b>                                         | 72°C, 20 sec                | 72°C, 1 min             |
| <b>Final elongation (PCR)/melting curve<br/>(qRT-PCR)</b> | 65°C-95°C                   | 72°C, 10 min            |
| <b>Number of cycles</b>                                   | 45                          | 35                      |

Supplementary Table 4. PCR efficiency and correlation coefficients of standard curves

| <b>Gene</b>                  | <b>qPCR<br/>reaction<br/>efficiency</b> | <b>R2<br/>correlation<br/>coefficient</b> |
|------------------------------|-----------------------------------------|-------------------------------------------|
| <i>ACTB</i>                  | 104.80%                                 | 0.991                                     |
| <i>GAPDH</i>                 | 98.90%                                  | 1                                         |
| <i>OCT4</i>                  | 96.90%                                  | 0.999                                     |
| <i>SOX2</i>                  | 97.30%                                  | 0.998                                     |
| <i>cMYC</i>                  | 93.50%                                  | 0.998                                     |
| <i>MyoD</i>                  | 91.90%                                  | 0.999                                     |
| <i>Brachyury</i>             | 99.20%                                  | 0.995                                     |
| <i>NKX2-5</i>                | 95.20%                                  | 0.997                                     |
| <i>TNNT2</i>                 | 103.40%                                 | 0.991                                     |
| <i>MYH6</i> ( $\alpha$ -MHC) | 101.20%                                 | 0.995                                     |
| <i>MYH7</i> ( $\beta$ -MHC)  | 96.70%                                  | 0.991                                     |
| <i>CX43</i>                  | 94%                                     | 0.997                                     |
| <i>TNNI 3</i>                | 97.30%                                  | 0.998                                     |
| <i>TNNI 1</i>                | 94.10%                                  | 0.997                                     |
| <i>KCNJ2</i>                 | 96.90%                                  | 0.995                                     |
| <i>SERCA2A</i>               | 90.20%                                  | 0.999                                     |

Abbreviations: *CX43*—connexin 43; *GAPDH*— glycerinaldehyde 3-phosphate dehydrogenase; *OCT4* – octamer-binding transcription factor 4; *SOX2* – SRY (sex determining region Y)-box 2; *MyoD* – myogenin differentiation 1; *NKX2-5* – NK2 homeobox 5; *TNNT2* – cardiac troponin T; *TNNI* – troponin I; *MYH6* ( $\alpha$ -MHC) –  $\alpha$  myosin heavy

chain, **MYH7** ( **$\beta$ -MHC**) –  $\beta$  myosin heavy chain, **KCNJ2** – potassium voltage-gated channel subfamily J member 2; **SERCA 2A** – sarcoplasmic/endoplasmic reticulum calcium ATPase; **ACTB**—beta actin.

Supplementary Table 5. Semi-quantitative optimization of cell differentiation protocol with respect to contractility expansion observed in SMiPSC-CMs on day 30 of *in vitro* culture.

| option | insulin first 2 days | BMP4             | CHIR99021         | IWR-1                                           | clone 10 | clone 11 | clone 13 |
|--------|----------------------|------------------|-------------------|-------------------------------------------------|----------|----------|----------|
| 1      | no                   | 25 ng/ml         | 5 $\mu$ M         | 10 $\mu$ M, medium every other day              | +++      | +++      | +++      |
| 2      | yes                  | 25 ng/ml         | 5 $\mu$ M         | 10 $\mu$ M, medium every other day              | +        | +        | ++       |
| 3      | yes                  | 25 ng/ml         | 5 $\mu$ M         | 10 $\mu$ M, no medium change                    | ++       | -        | +        |
| 4      | no                   | 25 ng/ml         | 5 $\mu$ M         | 10 $\mu$ M, medium every day                    | +++      | +        | +++      |
| 5      | no                   | 25 ng/ml         | 5 $\mu$ M         | 10 $\mu$ M, medium every other day till beating | +++      | ++       | +++      |
| 6      | yes                  | 25 ng/ml for 48h | 5 $\mu$ M         | 10 $\mu$ M, medium every other day              | +        | +        | -        |
| 7      | yes                  | 25 g/ml          | 5 $\mu$ M         | 10 $\mu$ M, medium every other day              | +        | +        | ++       |
| 8      | yes                  | 50 ng/ml         | 5 $\mu$ M         | 10 $\mu$ M, medium every other day              | -        | +        | -        |
| 9      | yes                  | 25 ng/ml         | 5 $\mu$ M         | 10 $\mu$ M, medium every other day for 5 days   | -        | -        | ++       |
| 10     | yes                  | 25 ng/ml         | 5 $\mu$ M for 72h | 10 $\mu$ M, medium every other day              | +        | ++       | -        |
| 11     | yes                  | 25 ng/ml         | 10 $\mu$ M        | 10 $\mu$ M, medium every other day              | -        | +        | +        |
| 12     | yes                  | 25 ng/ml         | 5 $\mu$ M         | 20 $\mu$ M, medium every other day              | -        | ++       | -        |

(-) no beating, + few beating patches, (++) numerous beating patches, (+++) synchronous beating throughout the well.

Abbreviation: **BMP4** *bone morphogenetic protein 4*; **CHIR99021** glycogen synthase kinase 3 inhibitor; **IWR-1** 4-(1,3,3a,4,7,7a-hexahydro-1,3-dioxo-4,7-methano-2Hisoindol-2-yl)-N-8-quinolinyl-benzamide.
